# Supplementary material for: Ruthenium(ii) polypyridyl complexes with visible light-enhanced anticancer activity and multimodal cell imaging
Source: Royal Society of Chemistry journal article supplement (doi:10.1039/d3dt01661g), 2023-01-01
Supplement: d3dt01661g1.pdf [file d3dt01661g1.pdf]

Supporting Information for

# **Ruthenium(II) Polypyridyl Complexes with Visible Light Enhanced Anticancer Activity and Multimodal Cell Imaging**

**Yan Kang,<sup>a,b,c</sup> Yao Zhao,<sup>\*a,d,e</sup> Yuanyuan Wei,<sup>a,b</sup> Yang Zhang,<sup>a,d</sup> Zhaoying Wang,<sup>a,d</sup> Qun Luo,<sup>a,d</sup> Jun Du,<sup>\*b</sup> and Fuyi Wang<sup>\*a,d</sup>**

<sup>a</sup> Beijing National Laboratory for Molecular Sciences; CAS Key Laboratory of Analytical Chemistry for Living Biosystems; National Centre for Mass Spectrometry in Beijing; Institute of Chemistry, Chinese Academy of Sciences, Beijing 100190, P. R. China

<sup>b</sup> College of Chemistry and Materials Science, Key Laboratory of Functional Molecular Solids, the Ministry of Education, Anhui Laboratory of Molecular-Based Materials, Anhui Normal University, Wuhu 241000, P. R. China

<sup>c</sup> College of Advanced Interdisciplinary Studies, National University of Defense Technology, Changsha 410073, China

<sup>d</sup> University of Chinese Academy of Sciences, Beijing 100049, P. R. China

<sup>e</sup> State Key Laboratory of Chemo/Biosensing and Chemometrics, Hunan University, Changsha 410082, P.R.China

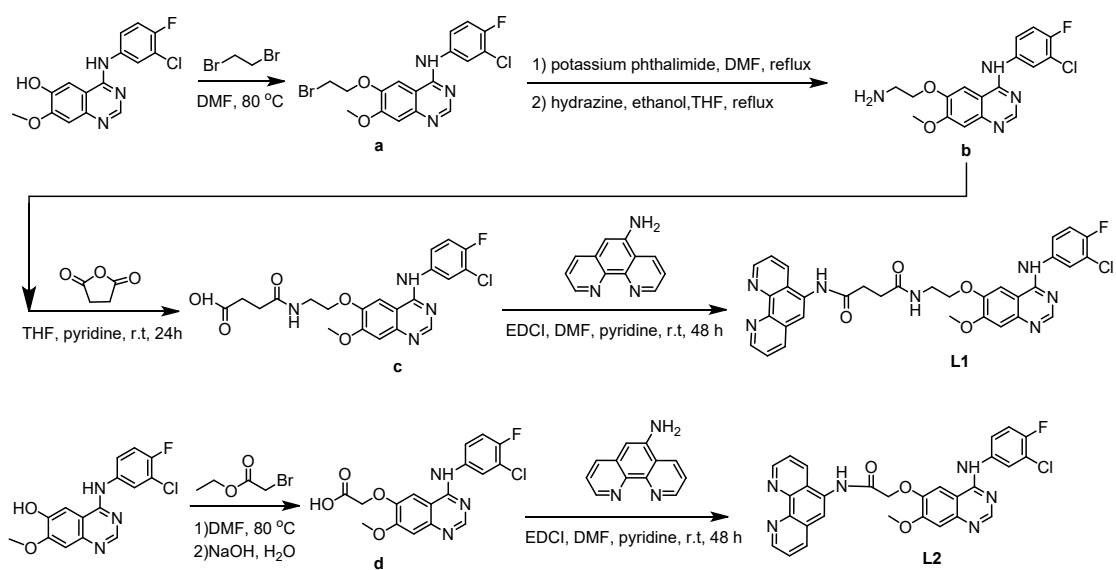

Scheme S1. Synthetic steps of ligand **L1** and **L2**.

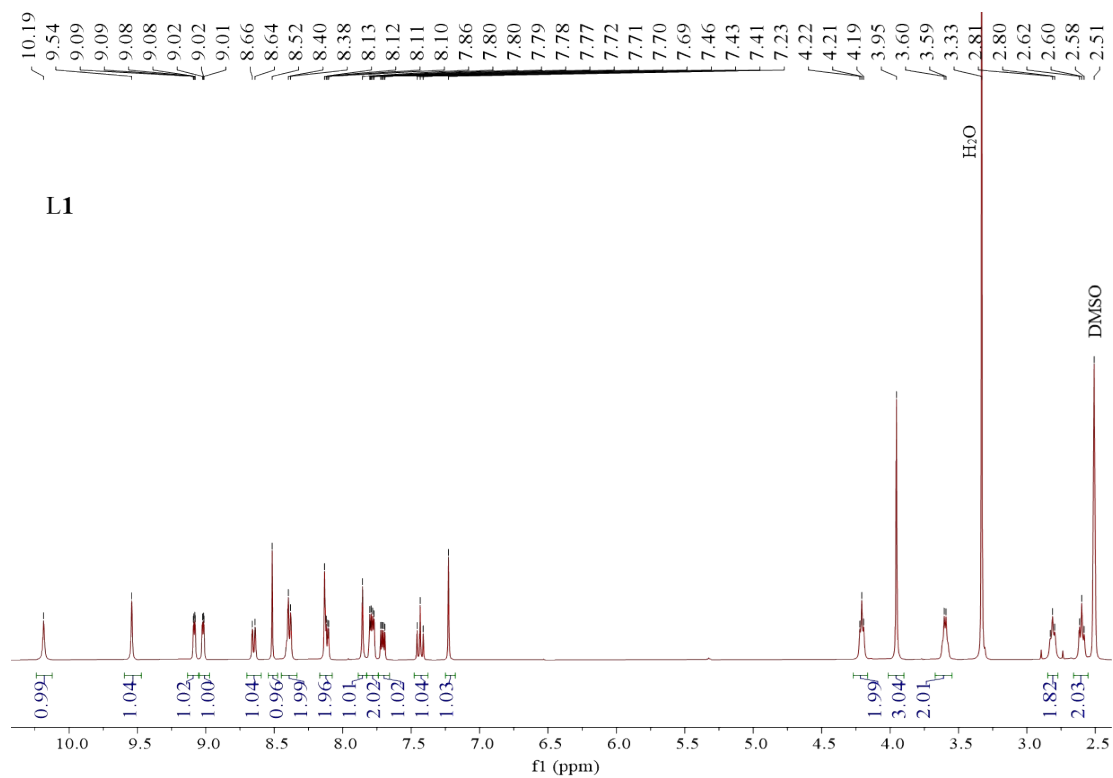

Figure S1. <sup>1</sup>H NMR spectrum of **L1** in DMSO-*d*<sup>6</sup>.

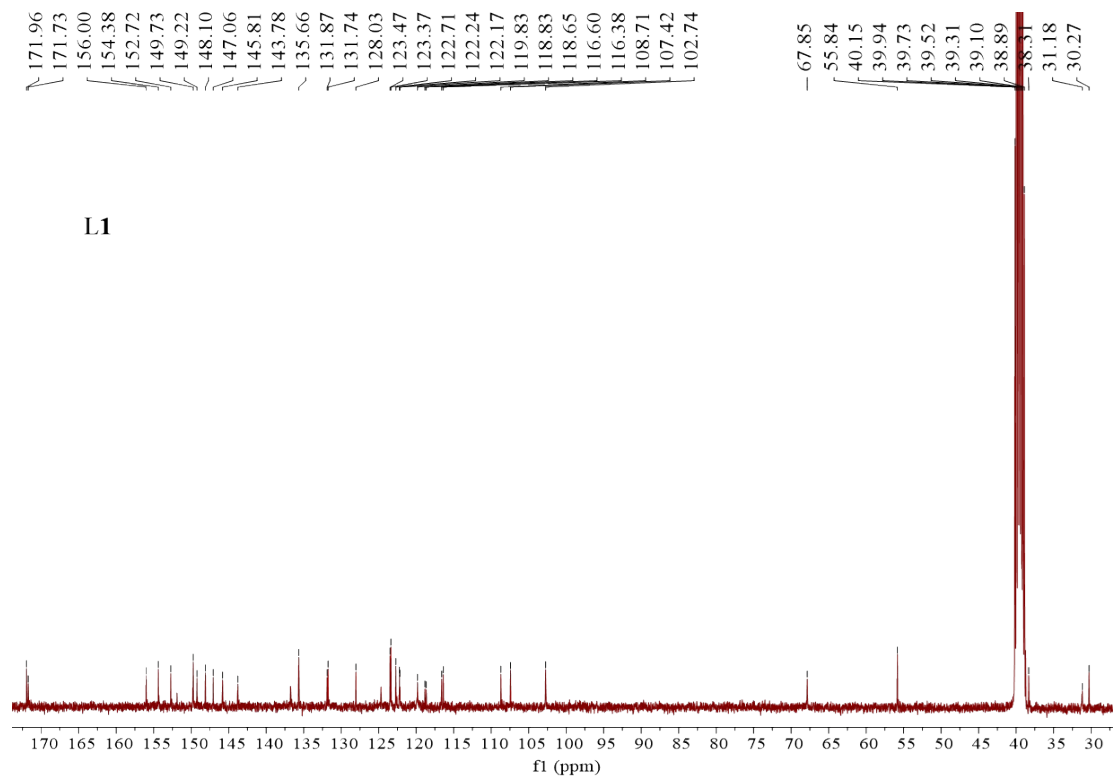

Figure S2. <sup>13</sup>C NMR spectrum of **L1** in DMSO-*d*<sup>6</sup>.

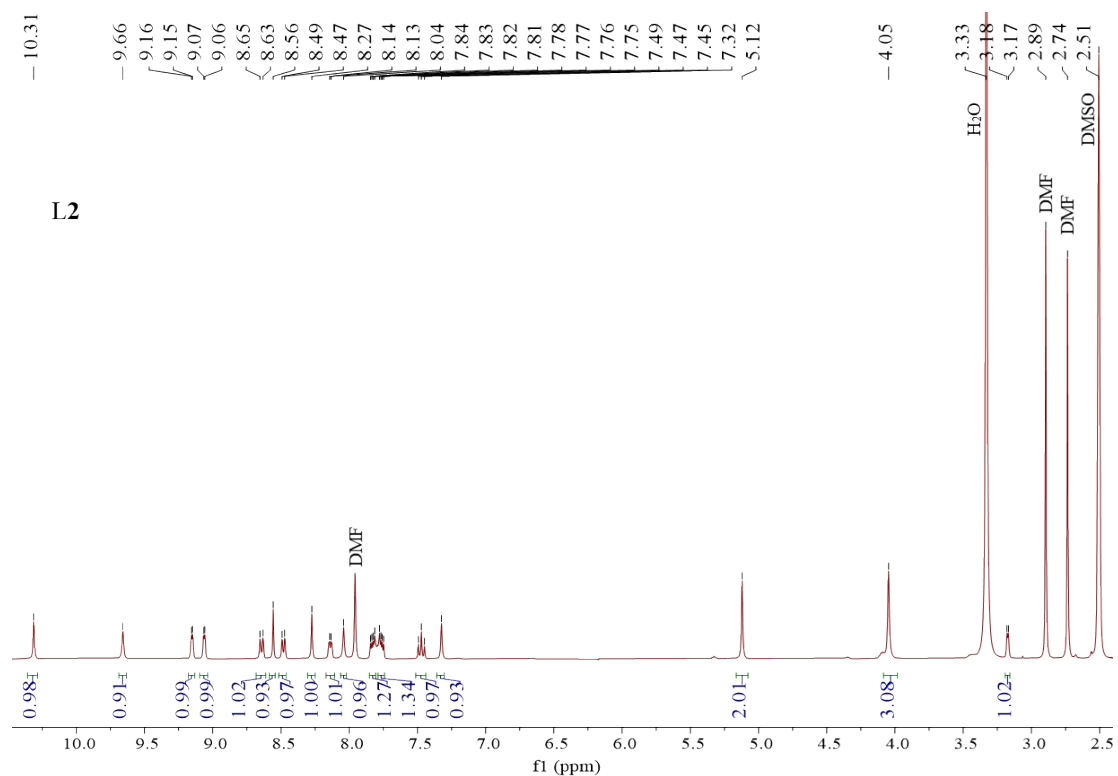

Figure S3. <sup>1</sup>H NMR spectrum of **L2** in DMSO-*d*<sup>6</sup>.

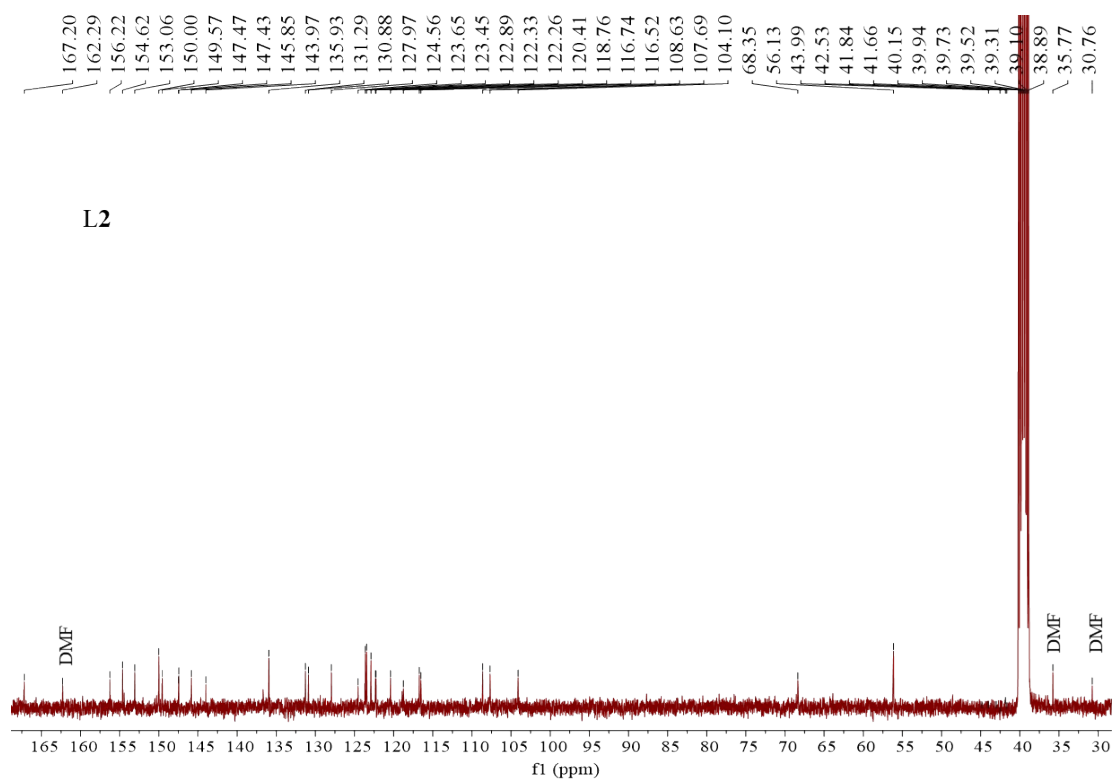

Figure S4. <sup>13</sup>C NMR spectrum of **L2** in DMSO-*d*<sup>6</sup>.

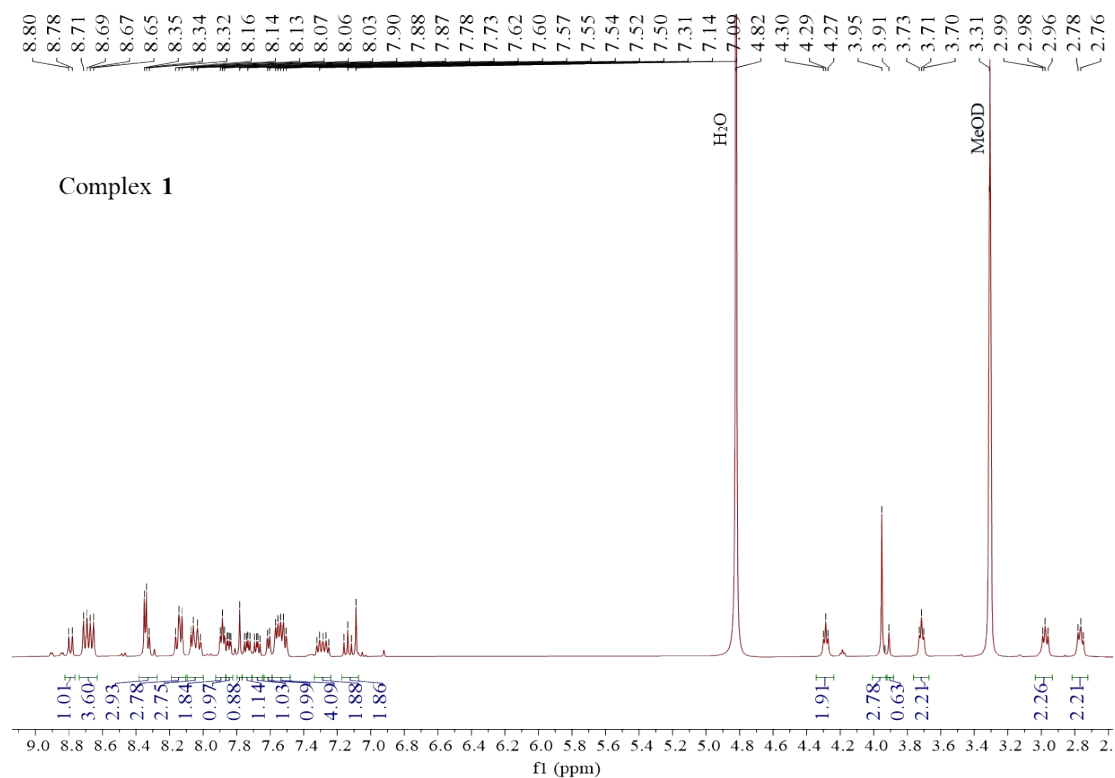

Figure S5. <sup>1</sup>H NMR spectrum of Complex 1 in MeOD-*d*<sup>4</sup>.

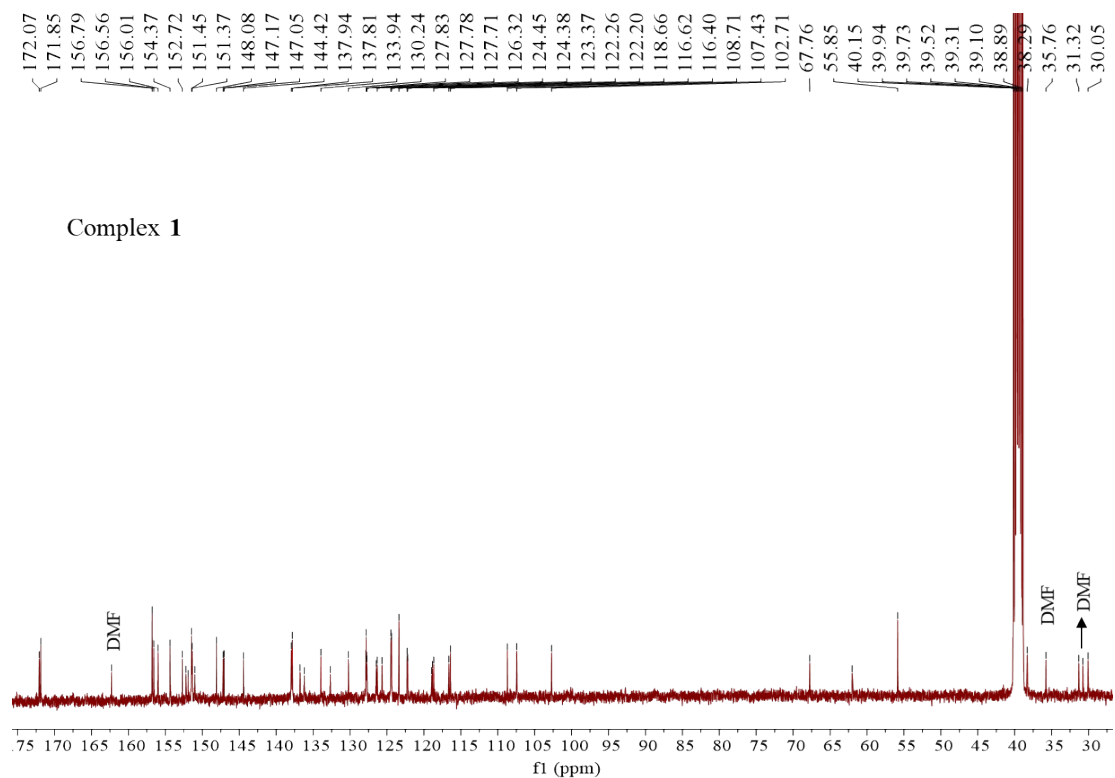

Figure S6. <sup>13</sup>C NMR spectrum of Complex 1 in DMSO-*d*<sup>6</sup>.

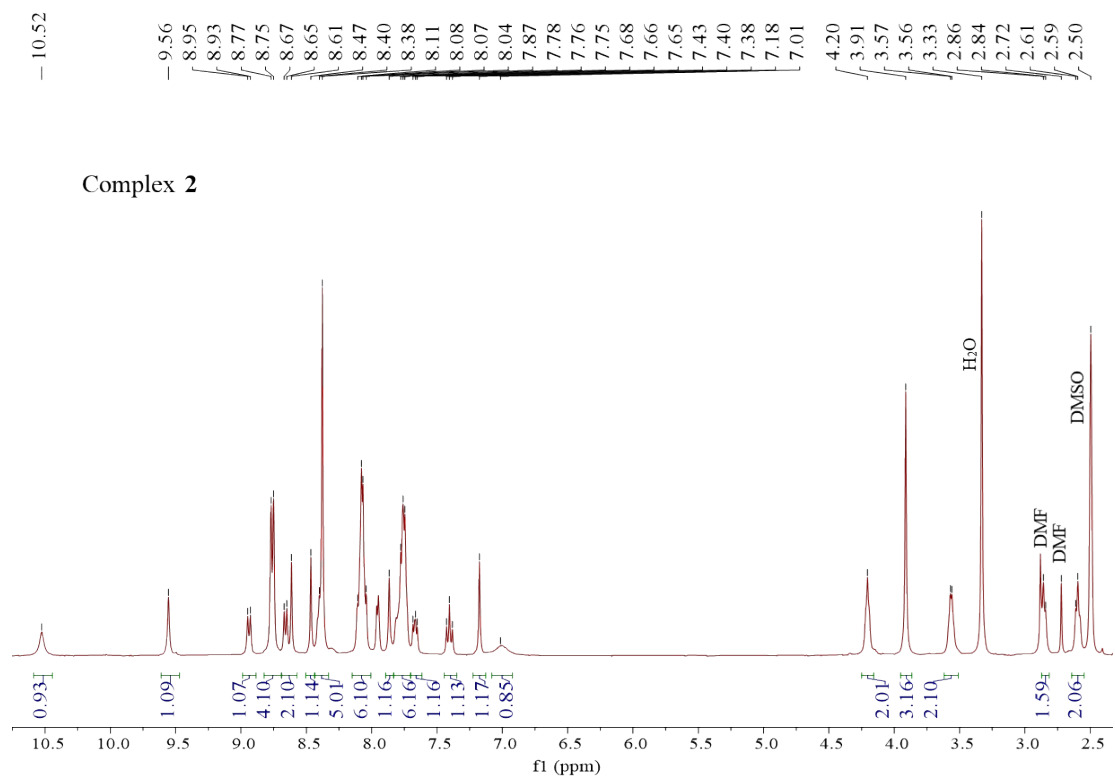

Figure S7.  $^1\text{H}$  NMR spectrum of Complex 2 in  $\text{DMSO-}d^6$ .

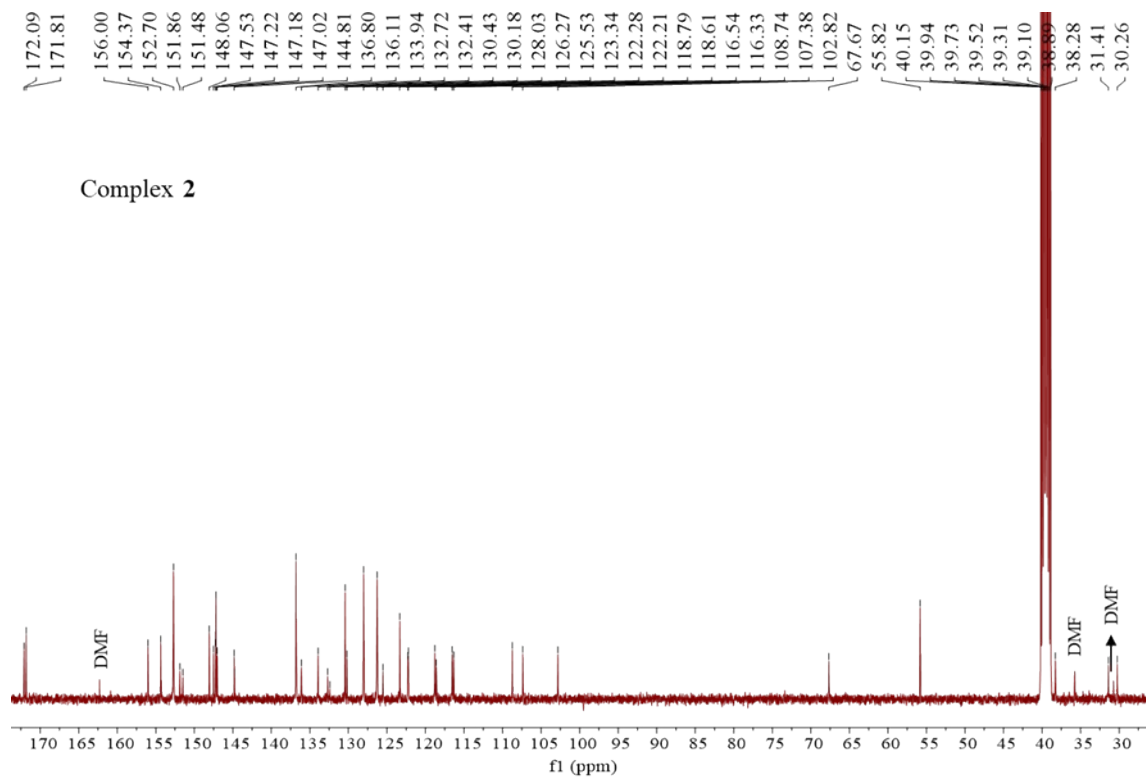

Figure S8.  $^{13}\text{C}$  NMR spectrum of Complex 2 in  $\text{DMSO-}d^6$ .

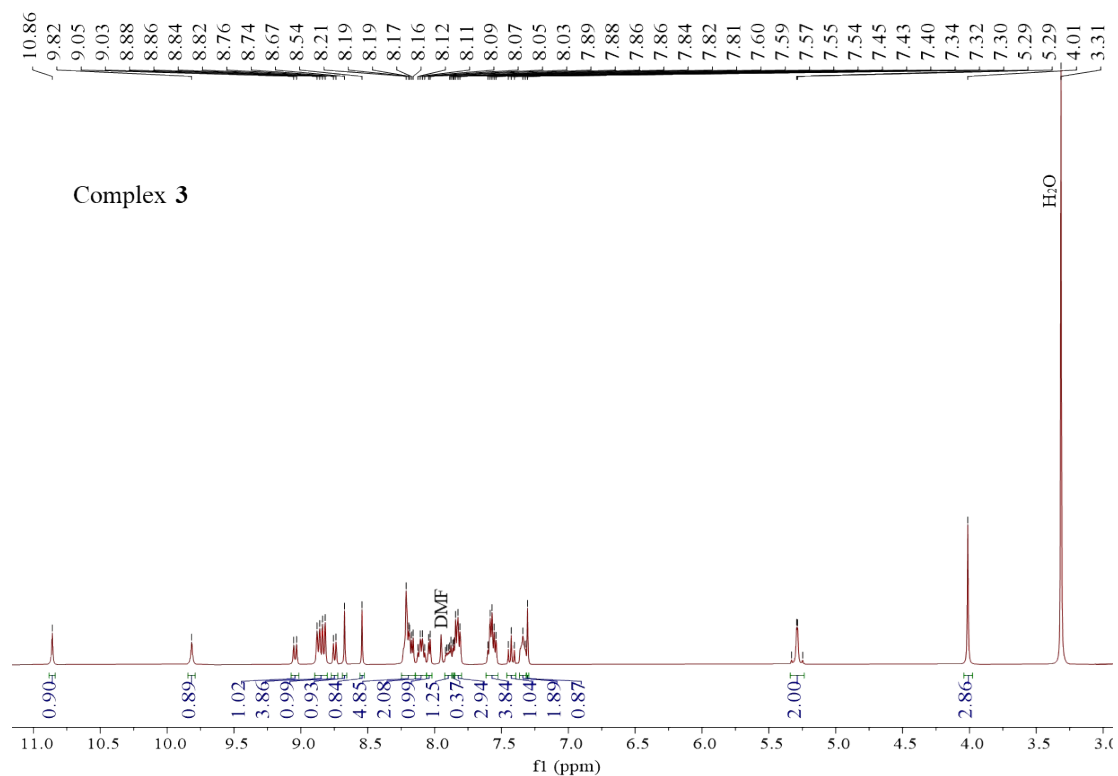

Figure S9. <sup>1</sup>H NMR spectrum of Complex 3 in DMSO-*d*<sup>6</sup>.

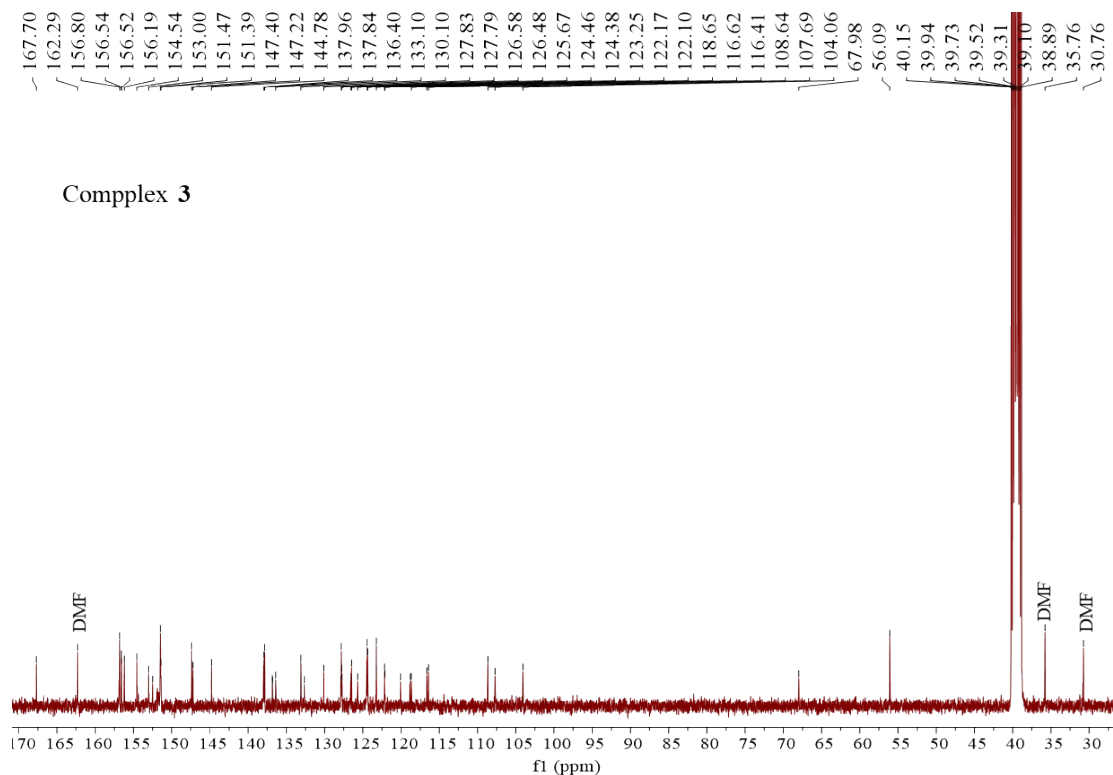

Figure S10. <sup>13</sup>C NMR spectrum of Complex 3 in DMSO-*d*<sup>6</sup>.

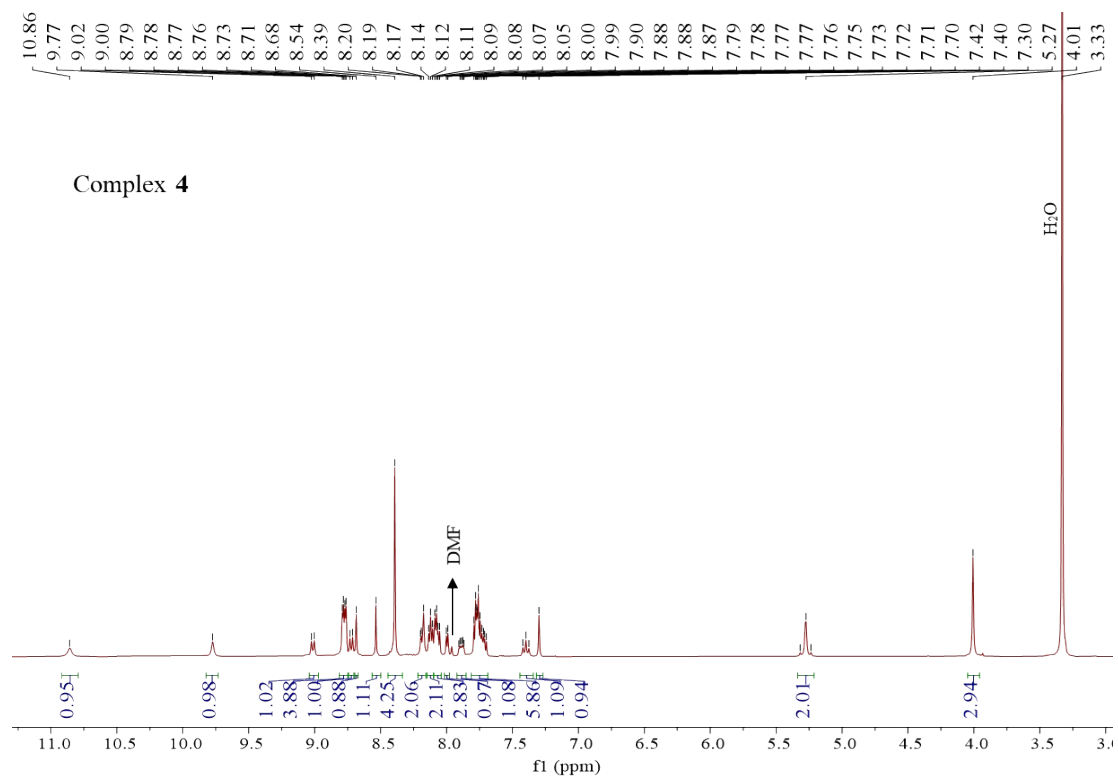

Figure S11. <sup>1</sup>H NMR spectrum of Complex 4 in DMSO-*d*<sup>6</sup>.

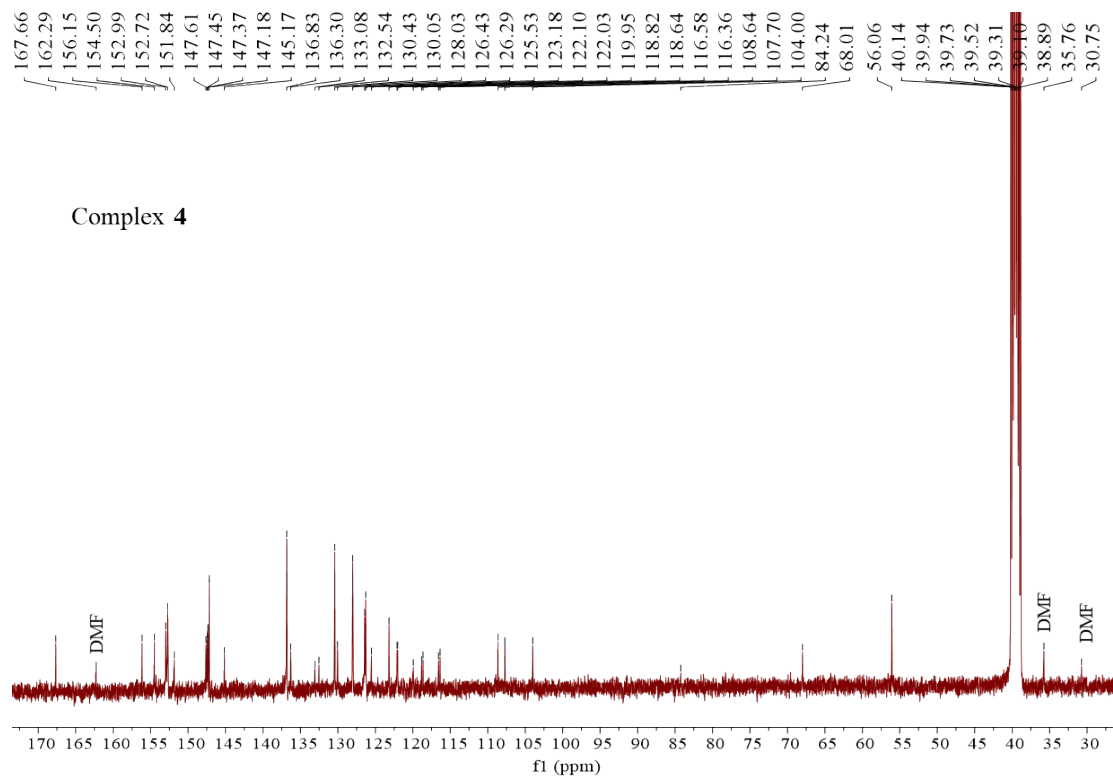

Figure S12. <sup>13</sup>C NMR spectrum of Complex 4 in DMSO-*d*<sup>6</sup>.



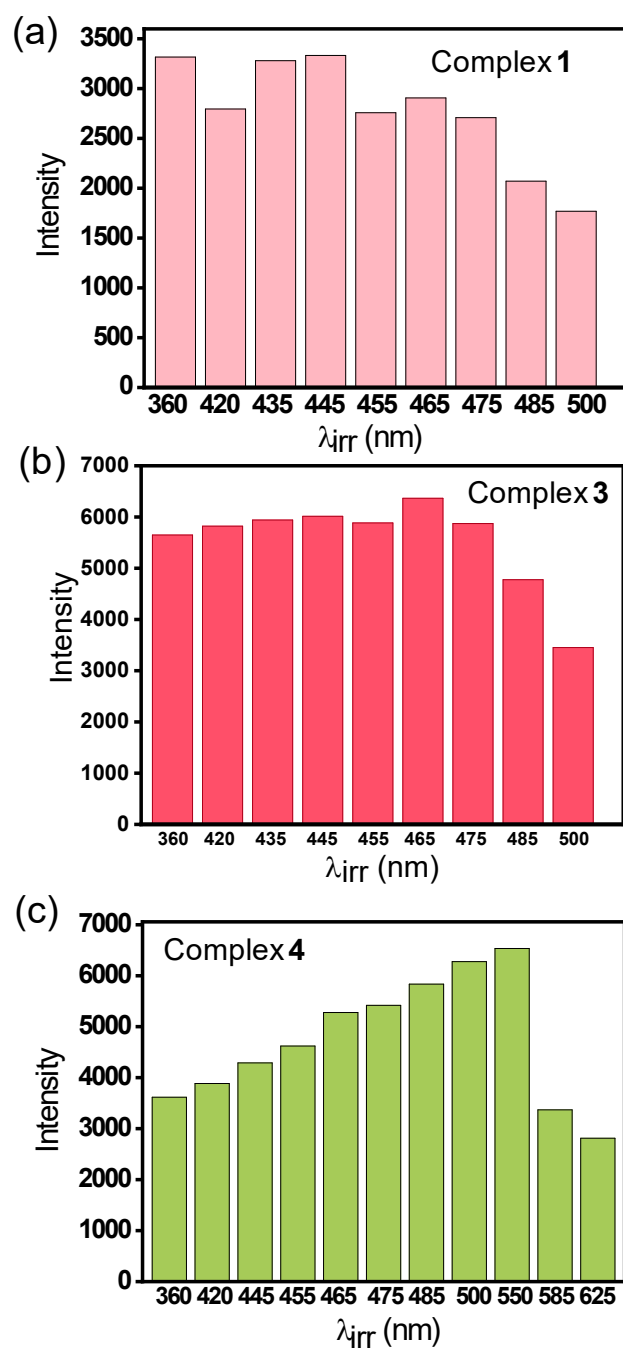

Figure S13. The intensity of fluorescence ( $\lambda_{ex} = 504$  nm,  $\lambda_{em} = 525$  nm) of ruthenium complexes **1** (a), **3** (b) and **4** (c) (50  $\mu$ M) in the presence of SOSG (1  $\mu$ M) in H<sub>2</sub>O (3% acetone) upon the irradiation for 10 min. The higher intensity of fluorescence suggested higher activation wavelength for the generation of singlet oxygen.

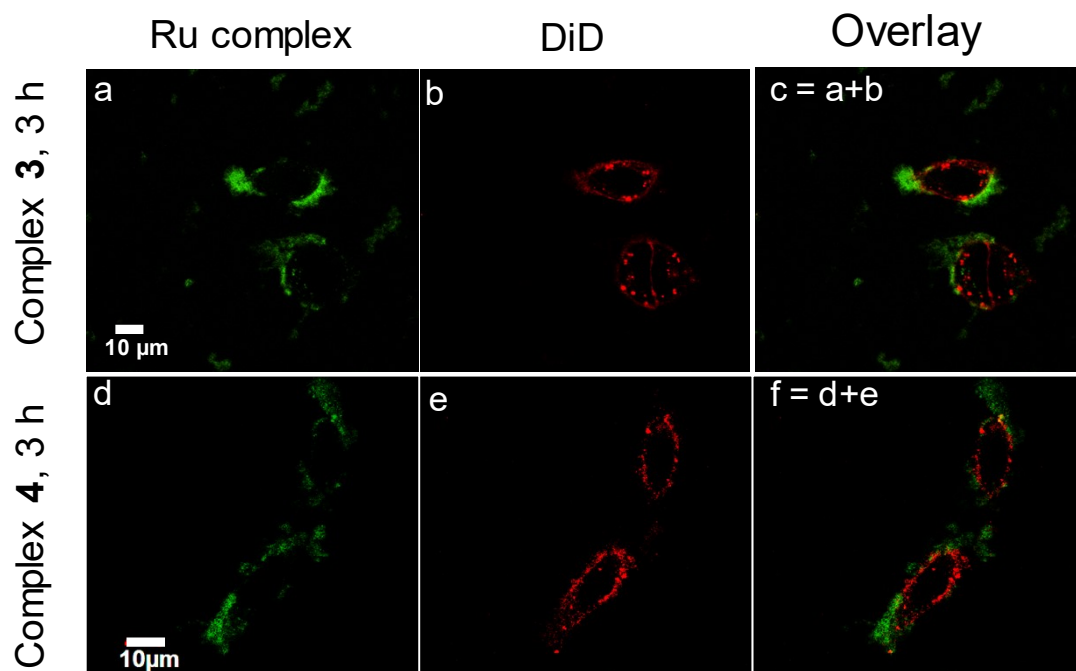

Figure S14. Fluorescence laser scan confocal microscopy images of A549 cells incubated with complexes **3** or **4** (10  $\mu$ M) at 310 K. Complex was incubated with cells for 3 h before DiD, a cell membrane dye, was incubated for 20 min. Wavelengths for complexes **3** and **4**,  $\lambda_{\text{ex}} = 488$  nm,  $\lambda_{\text{em}} = 600 - 630$  nm; for DiD,  $\lambda_{\text{ex}} = 633$  nm,  $\lambda_{\text{em}} = 650 - 680$  nm. c, merge of a and b; f, merge of d and e.
